# Supplementary material
Source: PubMed Central journal article supplement (PMC1829256)
Supplement: pnas_0700847104_3.pdf [file pnas_0700847104_3.pdf]

**Table 2. Lifespan in the germ-line longevity pathway is ligand dependent**

| Strain                   | Ligand ( $\Delta^4$ ) | Lifespan, days |                  | No. of animals (no. of expts) | P value                                                            |
|--------------------------|-----------------------|----------------|------------------|-------------------------------|--------------------------------------------------------------------|
|                          |                       | Mean $\pm$ SD  | Maximum $\pm$ SD |                               |                                                                    |
| N2                       | -                     | 15 $\pm$ 2     | 24 $\pm$ 4       | 163(2)                        |                                                                    |
|                          | $\Delta^4$            | 17 $\pm$ 2     | 29 $\pm$ 1       | 170(2)                        | <0.00001*                                                          |
| <i>daf-36(k114)</i>      | -                     | 12 $\pm$ 1     | 21 $\pm$ 1       | 241(2)                        | <0.00001*                                                          |
|                          | $\Delta^4$            | 13 $\pm$ 2     | 25 $\pm$ 1       | 309(2)                        | <0.00001 <sup>†</sup> , <0.00001 <sup>‡</sup>                      |
| <i>daf-9(rh50)</i>       | -                     | 11 $\pm$ 1     | 19 $\pm$ 5       | 142(2)                        | <0.00001*                                                          |
|                          | $\Delta^4$            | 13 $\pm$ 3     | 31 $\pm$ 6       | 169(2)                        | <0.00001 <sup>†</sup> , 0.00011 <sup>‡</sup>                       |
| <i>daf-12(rh61rh411)</i> | -                     | 11             | 21               | 87(1)                         | <0.00001*                                                          |
|                          | $\Delta^4$            | 12             | 21               | 140(1)                        | <0.00001 <sup>†</sup> , 0.69 <sup>‡</sup>                          |
| <i>glp-1(e2141)</i>      | -                     | 18 $\pm$ 0     | 33 $\pm$ 1       | 191(2)                        | 0.000039*                                                          |
|                          | $\Delta^4$            | 20 $\pm$ 0     | 33 $\pm$ 0       | 140(2)                        | <0.00001 <sup>†</sup> , 0.00003 <sup>‡</sup>                       |
| <i>e2141 k114</i>        | -                     | 14 $\pm$ 2     | 43 $\pm$ 12      | 342(2)                        | 0.27*, <0.00001 <sup>§</sup>                                       |
|                          | $\Delta^4$            | 23 $\pm$ 10    | 52 $\pm$ 11      | 333(2)                        | <0.00001 <sup>†</sup> , <0.00001 <sup>‡</sup> , 0.015 <sup>¶</sup> |
| <i>e2141 rh50</i>        | -                     | 16 $\pm$ 1     | 36 $\pm$ 3       | 329(2)                        | <0.00001*, <0.083 <sup>§  </sup>                                   |
|                          | $\Delta^4$            | 20 $\pm$ 1     | 44 $\pm$ 4       | 336(2)                        | <0.00001 <sup>†</sup> , <0.00001 <sup>‡</sup> , 0.055 <sup>¶</sup> |

Data is supplementary to Table 1. All experiments were done at 25°C. The ligand ( $\Delta^4$ ) was added during larval development and adulthood. (-): only vehicle (100% EtOH) was added. SDs were calculated on the average of the mean or maximum of individual experiments. P values were determined on pooled experiments using the log rank test (Mantel-Cox).

\*Compared to N2 worms without ligand (-).

<sup>†</sup>Compared to N2 worms exposed to the  $\Delta^4$  ligand ( $\Delta^4$ ).

<sup>‡</sup>Compared to the same strain without ligand (-).

<sup>§</sup>Compared to *glp-1* worms without ligand (-).

<sup>¶</sup>Compared to *glp-1* worms exposed to the  $\Delta^4$  ligand ( $\Delta^4$ ).

<sup>||</sup>Significant in T test against *glp-1(e2141)* (p < 0.005) for only one trial out of two.
