# Supplementary material
Source: PubMed Central journal article supplement (PMC1829256)
Supplement: pnas_0700847104_4.pdf [file pnas_0700847104_4.pdf]

**Table 3. Heat stress resistance**

| Exp. | Genotype             | Ligand ( $\Delta^4$ ) or <i>daf-9(+)</i> expression | Lifespan, hours |         | No. of animals | P value                                          | Figure    |
|------|----------------------|-----------------------------------------------------|-----------------|---------|----------------|--------------------------------------------------|-----------|
|      |                      |                                                     | Mean            | Maximum |                |                                                  |           |
| 1    | N2 (wild type)       | -                                                   | 8.2             | 10      | 47             |                                                  | 4 A and B |
|      |                      | $\Delta^4$                                          | 8.4             | 10      | 18             | 0.54*                                            | 4 A and B |
|      | <i>daf-9(dh6)**</i>  | -                                                   | 13              | 19      | 42             | <0.00001*                                        | 4A        |
|      |                      | $\Delta^4$                                          | 7.8             | 9       | 40             | 0.016 <sup>†</sup> ,<br><0.00001 <sup>‡</sup>    | 4A        |
|      | <i>daf-9(e1406)</i>  | -                                                   | 11              | 20      | 40             | <0.00001*                                        | 4B        |
|      |                      | $\Delta^4$                                          | 7.9             | 10      | 40             | 0.046 <sup>†</sup> ,<br><0.00001 <sup>‡</sup>    | 4B        |
| 2    | N2                   | -                                                   | 10.3            | 15      | 44             |                                                  | 4C        |
|      |                      | $\Delta^4$                                          | 9.3             | 13      | 34             | 0.020*                                           | 4C        |
|      | <i>dh6**</i>         | -                                                   | 18.0            | 23      | 21             | <0.00001*                                        |           |
|      |                      | $\Delta^4$                                          | 6.5             | 8       | 24             | <0.00001 <sup>†</sup> ,<br><0.00001 <sup>‡</sup> |           |
|      | <i>daf-2(e1370)</i>  | -                                                   | 19.5            | 23      | 33             | <0.00001*                                        | 4C        |
|      |                      | $\Delta^4$                                          | 19.4            | 22      | 29             | <0.00001 <sup>†</sup> , 0.75 <sup>‡</sup>        | 4C        |
| 3    | N2                   |                                                     | 8.2             | 10      | 49             |                                                  | 4 D and F |
|      | <i>e1406</i>         |                                                     | 16.7            | 28      | 40             | <0.00001 <sup>§</sup> ,<br><0.00001 <sup>¶</sup> | 4 D and F |
|      | <i>e1406 dhEx203</i> | XXX                                                 | 8.7             | 12      | 50             | 0.030 <sup>§</sup> ,<br><0.00001 <sup>¶</sup>    | 4D        |
|      | <i>e1406 dhEx294</i> | hyp                                                 | 9.0             | 12      | 50             | 0.0040 <sup>§</sup> ,<br><0.00001 <sup>¶</sup>   | 4D        |
|      | <i>din-1(dh127)</i>  |                                                     | 7.1             | 10      | 47             | 0.00013 <sup>§</sup> ,<br><0.00001 <sup>¶</sup>  | 4F        |
|      | <i>e1406 dh127</i>   |                                                     | 8.4             | 10      | 50             | 0.39 <sup>§</sup>                                | 4F        |

| Exp. | Genotype                  | Ligand ( $\Delta^4$ ) or <i>daf-9(+)</i> expression | Lifespan, hours |         | No. of animals | P value                                          | Figure |
|------|---------------------------|-----------------------------------------------------|-----------------|---------|----------------|--------------------------------------------------|--------|
|      |                           |                                                     | Mean            | Maximum |                |                                                  |        |
| 4    | N2                        | -                                                   | 5.8             | 8       | 48             |                                                  | 4E     |
|      |                           | $\Delta^4$                                          | 5.7             | 8       | 46             | 0.62*                                            |        |
|      | <i>dh6**</i>              | -                                                   | 8.8             | 12      | 41             | <0.00001*                                        | 4E     |
|      |                           | $\Delta^4$                                          | 5.2             | 6       | 50             | 0.0020 <sup>†</sup> ,<br><0.00001 <sup>‡</sup>   |        |
|      | <i>daf-12(rh61rh411)</i>  | -                                                   | 5.9             | 8       | 47             | 0.79*                                            | 4E     |
|      |                           | $\Delta^4$                                          | 5.8             | 8       | 48             | 0.66 <sup>†</sup> , 0.83 <sup>‡</sup>            |        |
|      | <i>dh6 rh61rh411</i>      | -                                                   | 5.9             | 8       | 49             | 0.82*                                            | 4E     |
|      |                           | $\Delta^4$                                          | 5.6             | 8       | 51             | 0.74 <sup>†</sup> , 0.23 <sup>‡</sup>            |        |
| 5    | N2                        |                                                     | 7.9             | 10      | 50             |                                                  | 4G     |
|      | <i>dh6<sup>††</sup></i>   |                                                     | 15.3            | 22      | 49             | <0.00001 <sup>§</sup> ,<br><0.00001 <sup>¶</sup> | 4G     |
|      | <i>daf-16(mgDf50)</i>     |                                                     | 8.0             | 10      | 46             | 0.18 <sup>§</sup> , 0.000079 <sup>¶</sup>        | 4G     |
|      | <i>dh6 mgDf50</i>         |                                                     | 9.6             | 16      | 50             | <0.00001 <sup>§</sup>                            | 4G     |
| 6    | N2                        |                                                     | 10.6            | 14      | 41             |                                                  | 4H     |
|      | <i>dh6<sup>††</sup></i>   |                                                     | 17.1            | 22      | 41             | <0.00001 <sup>§</sup>                            |        |
|      | <i>mgDf50</i>             |                                                     | 10.1            | 14      | 50             | 0.35 <sup>§</sup> , <0.00001 <sup>¶</sup>        | 4H     |
|      | <i>e1370</i>              |                                                     | 17.0            | 20      | 48             | <0.00001 <sup>§</sup> ,<br><0.00001 <sup>¶</sup> | 4H     |
|      | <i>e1370 daf-16(mg47)</i> |                                                     | 12.6            | 18      | 46             | 0.000069 <sup>§</sup>                            | 4H     |

( $\Delta^4$ ), ligand was added during larval development and adult. (-), only vehicle (100% EtOH) was added. *daf-9* cDNA was tissue-specific expressed in XXX cells (XXX) or in the hypodermis (hyp). P values were determined by using the log rank test (Mantel-Cox) for individual experiments compared to strains examined at the same time. *e1406* was derived from *daf-9(e1406) dhEx203*.

\*Compared to N2 worms without ligand (-).

<sup>†</sup>Compared to N2 worms exposed to the  $\Delta^4$  ligand during larval development and adulthood ( $\Delta^4$ ).

<sup>‡</sup>Compared to the same strain without ligand (-).

<sup>§</sup>Compared to N2 worms of the same experiment.

<sup>¶</sup>Compared to the double mutant with the corresponding genotype.

<sup>||</sup>Compared to *daf-9(e1406)* without *daf-9(+)* expression constructs.

\*\**dh6* was derived from the strain *daf-9(dh6) dhEx24*.

<sup>††</sup>*dh6* was derived from *daf-9(dh6) dhEx203*.
