# Supplementary material
Source: PubMed Central journal article supplement (PMC1829256)
Supplement: pnas_0700847104_5.pdf [file pnas_0700847104_5.pdf]

**Table 4. *daf-9* is resistant to oxidative stress induced by hydrogen peroxide**

| Exp/concentration<br>H <sub>2</sub> O <sub>2</sub> , mM | Genotype                 | Ligand ( $\Delta^4$ )<br>or <i>daf-9</i> (+)<br>expression | Lifespan, hours |         | No. of<br>animals | P value                                          | Figure    |
|---------------------------------------------------------|--------------------------|------------------------------------------------------------|-----------------|---------|-------------------|--------------------------------------------------|-----------|
|                                                         |                          |                                                            | Mean            | Maximum |                   |                                                  |           |
| 1/4.4                                                   | N2 (wild type)           | -                                                          | 3.1             | 4       | 25                |                                                  | 4I and 6C |
|                                                         |                          | $\Delta^4$                                                 | 2.8             | 5       | 25                | 0.47*                                            | 4I        |
|                                                         | <i>daf-9(dh6)**</i>      | -                                                          | >21             | >25     | 22                | <0.00001*                                        | 4I and 6C |
|                                                         |                          | $\Delta^4$                                                 | 3.9             | 5       | 25                | 0.00010 <sup>†</sup> ,<br><0.00001 <sup>‡</sup>  | 4I        |
|                                                         | <i>daf-12(rh61rh411)</i> | -                                                          | 3.2             | 5       | 25                | 0.36*                                            | 6C        |
|                                                         |                          | $\Delta^4$                                                 | 2.7             | 4       | 24                | 0.71 <sup>†</sup> , 0.0596 <sup>‡</sup>          |           |
|                                                         | <i>dh6 rh61rh411</i>     | -                                                          | 2.8             | 5       | 25                | 0.48*                                            | 6C        |
|                                                         |                          | $\Delta^4$                                                 | 3.0             | 5       | 25                | 0.497 <sup>†</sup> , 0.517 <sup>‡</sup>          |           |
| 2/8.4                                                   | N2                       | -                                                          | 2.6             | 4       | 15                |                                                  | 4J        |
|                                                         |                          | $\Delta^4$                                                 | 2.9             | 5       | 22                | 0.32*                                            | 4J        |
|                                                         | <i>dh6**</i>             | -                                                          | >7              | >7      | 24                | <0.00001*                                        | 4J        |
|                                                         |                          | $\Delta^4$                                                 | 2.5             | 3       | 22                | 0.13 <sup>†</sup> ,<br><0.00001 <sup>‡</sup>     |           |
|                                                         | <i>daf-2(e1370)</i>      | -                                                          | 3.9             | 6       | 16                | 0.0001*                                          | 4J        |
|                                                         |                          | $\Delta^4$                                                 | 5.0             | 7       | 21                | <0.00001 <sup>†</sup> ,<br>0.0013 <sup>‡</sup>   | 4J        |
| 3/7.5                                                   | N2                       |                                                            | 2.4             | 5       | 59                |                                                  | 6D        |
|                                                         | <i>dh6<sup>††</sup></i>  |                                                            | >9              | >13     | 29                | <0.00001 <sup>§</sup> ,<br><0.00001 <sup>¶</sup> | 6D        |
|                                                         | <i>din-1(dh127)</i>      |                                                            | 2.5             | 5       | 60                | 0.88 <sup>§</sup> , 0.75 <sup>¶</sup>            | 6D        |
|                                                         | <i>e1406 dh127</i>       |                                                            | 2.1             | 5       | 60                | 0.85 <sup>§</sup>                                | 6D        |

| Exp/concentration<br>H <sub>2</sub> O <sub>2</sub> , mM | Genotype                 | Ligand ( $\Delta^4$ )<br>or <i>daf-9(+)</i><br>expression | Lifespan, hours |         | No. of<br>animals | P value                                        | Figure    |
|---------------------------------------------------------|--------------------------|-----------------------------------------------------------|-----------------|---------|-------------------|------------------------------------------------|-----------|
|                                                         |                          |                                                           | Mean            | Maximum |                   |                                                |           |
| 4/5                                                     | N2                       |                                                           | 3.9             | 5       | 28                |                                                | 6 A and B |
|                                                         | <i>dh6</i> <sup>††</sup> |                                                           | >8              | >8      | 20                | <0.00001 <sup>§</sup>                          |           |
|                                                         | <i>e1406</i>             |                                                           | >7              | >8      | 14                | <0.00001 <sup>§</sup>                          | 6 A and B |
|                                                         | <i>e1406 dhEx203</i>     | XXX                                                       | 4.5             | 5       | 30                | 0.001 <sup>§</sup> ,<br><0.00001 <sup>  </sup> | 6A        |
|                                                         | <i>e1406 dhEx294</i>     | hyp                                                       | 4.4             | 5       | 39                | 0.002 <sup>§</sup> ,<br><0.00001 <sup>  </sup> | 6B        |
|                                                         | <i>e1370</i>             |                                                           | 5.3             | 7       | 30                | <0.00001 <sup>§</sup>                          | 6 A and B |

( $\Delta^4$ ), ligand was added during larval development and adult. (-), only vehicle (100% EtOH) was added. *daf-9* cDNA was tissue specific expressed in XXX cells (XXX) or in the hypodermis (hyp). P values were determined by using the log rank test (Mantel-Cox) for individual experiments compared to strains examined at the same time. *e1406* was derived from *daf-9(e1406) dhEx203*.

\*Compared to N2 worms without ligand (-).

†Compared to N2 worms exposed to the  $\Delta^4$  ligand during larval development and adulthood.

‡Compared to the same strain without ligand (-).

§Compared to N2 worms of the same experiment.

¶Compared to the double mutant with the corresponding genotype.

||Compared to *daf-9(e1406)* without *daf-9(+)* expression constructs.

\*\**dh6* was derived from the strain *daf-9(dh6) dhEx24*.

††*dh6* was derived from *daf-9(dh6) dhEx203*.
